# Supplementary material for: Atoll-scale patterns in coral reef community structure: Human signatures on Ulithi Atoll, Micronesia
Source: PLoS One. 2017 May 10;12(5):e0177083. doi: 10.1371/journal.pone.0177083 (PMC5425048; doi:10.1371/journal.pone.0177083)
Supplement: S2 Table — (DOCX) [file pone.0177083.s002.docx]

**Supplemental Table 2.** Functional group definitions for benthic community structure.

| **Functional category** | **Morphological Group** | **Description** |
| --- | --- | --- |
| Stony Corals & Hydrozoans | Encrusting | Follows contour of substrate; no upright branches or unattached edges. |
| Sheeting/Plating | Lays against substrate. Can be layered; sheets may be thin or thick. Sheets have distinct, unattached edges. |
| Foliose | Layers curve upward from substrate resulting in lettuce-like appearance. |
| Branching 1 | Simple branching: no or few lateral arms on each projection. All branches may be same height; branches may be flattened. |
| Branching 2 | Complex, second-order branching: lateral arms have offshoots/branchlets. |
| Thicket | *Acropora* species with dense, interwoven branches; multiple individuals. |
| Table | *Acropora* species that sometimes have basal stem and horizontal growth with small vertical branchlets on upper surface. |
| Columnar | Thick columns projecting from common base with corallites. |
| Mounding 1 | Spherical or hemi-spherical with smooth shape; little/no vertical relief between corallites. Can be flattened (as *Symphilia*), but is thick and can produce mounds. |
| Mounding 2 | Two orders of complexity: overall hemispherical shape but corallites project upward >1 cm above primary mound. Provides moderate vertical relief. |
| Solitary | Single polyp, may be free-living |
| Outbreak *Montipora* sp. | Noted as own category—highly variable in growth forms, often with multiple forms simultaneously (e.g., foliose with small columns, sheeting, etc.). |
| *Helipora* spp. | Noted as own category with subcategory of its growth form using above forms. |
| *Millepora* spp. | Noted as own category with subcategory of its growth form using above forms. |
| Soft Corals | Soft coral  Leather coral | All alcyonids. |
|  | Corallimorph |  |
| Zooanthid |  |
| Fleshy Algae | Fleshy Brown algae |  |
| Fleshy Red algae |  |
| Filamentous Green algae |  |
| Fleshy Green algae |  |
| Calcareous Algae | Calcareous Green Algae |  |
| Calcareous Red Algae |  |
| Crustose Coralline Algae |  |
| Rhodolith |  |
| Turf | Turf | Filamentous, <2 cm length. |
| Cyanobacteria | Cyanobacteria | Noted base substrate (e.g., *Montipora*) if overgrowing coral or other living form. |
| Seagrass | Seagrass |  |
| Abiotic | Sand | > 1 cm deep |
| Rubble | Noted whether bare or covered with turf. |
| Bare calcium carbonate substrate (no corallite skeletons obvious, i.e., ‘old dead’ coral) |  |
| Non-coral Sessile invertebrates | Encrusting sponge |
| Upright sponge |  |
| Encrusting tunicate |  |
| Upright tunicate |  |
| Anemone |  |
| Mobile invertebrates (total # counted) | Sea cucumber |  |
| Sea Urchin |  |
| *Tridacna* |  |
| *Trochus* |  |
| Worm snail (vermetidae) |  |
